# Supplementary material
Source: bioRxiv or medRxiv preprint supplement (http://biorxiv.org/highwire/filestream/8602/field_highwire_adjunct_files/0/032169-1.pdf)
Supplement: Supplementary file [file 032169-1.pdf]

## Supplementary Information

**Table S1.** Good's coverage estimation for concatenated MLSA sequences and individual loci sampled across the 13 sites in which they were found. Values are calculated for unique sequences or for operational taxonomic units defined at a 0.01 nucleotide dissimilarity cutoff.

| Phylogroup | concatenated |      | <i>atpD</i> |      | <i>gyrB</i> |      | <i>recA</i> |      | <i>rpoB</i> |      | <i>trpB</i> |      |
|------------|--------------|------|-------------|------|-------------|------|-------------|------|-------------|------|-------------|------|
|            | unique       | 0.01 | unique      | 0.01 | unique      | 0.01 | unique      | 0.01 | unique      | 0.01 | unique      | 0.01 |
| MAN125     | 0.64         | 1    | 1           | 1    | 0.87        | 1    | 0.91        | 1    | 1           | 1    | 0.96        | 1    |
| MAN196     | 0.62         | 1    | 0.98        | 1    | 0.91        | 1    | 0.98        | 1    | 1           | 1    | 0.96        | 1    |
| WA1063     | 0.47         | 0.95 | 0.95        | 1    | 0.95        | 0.95 | 0.89        | 0.95 | 0.79        | 1    | 0.84        | 0.95 |
| MS200      | 0.3          | 1    | 0.89        | 1    | 0.67        | 1    | 0.67        | 0.96 | 0.67        | 1    | 0.67        | 1    |
| MS152      | 0.18         | 0.94 | 0.88        | 1    | 0.71        | 0.94 | 0.47        | 0.94 | 0.82        | 1    | 0.41        | 0.88 |
| F34        | 0.3          | 1    | 0.83        | 0.97 | 0.78        | 1    | 0.97        | 1    | 0.89        | 1    | 0.78        | 0.97 |

**Table S2.** Individual MLSA loci have incongruent phylogenetic histories, as indicated by the Shimodaira-Hasegawa test for phylogenetic incongruence. Rows represent maximum likelihood topologies and columns the nucleotide alignments used to evaluate incongruence. Corresponding phylogenetic trees were constructed as defined in the methods and are depicted in Figure S3.

|              | <i>atpD</i> | <i>gyrB</i> | <i>recA</i> | <i>rpoB</i> | <i>trpB</i> | concatenated |
|--------------|-------------|-------------|-------------|-------------|-------------|--------------|
| <i>atpD</i>  | --          | 0           | 0           | 0           | 0           | 0            |
| <i>gyrB</i>  | 7.0E-04     | --          | 1.8E-03     | 4.8E-02     | 2.3E-03     | 2.3E-03      |
| <i>recA</i>  | 0           | 3.3E-03     | --          | 7.5E-03     | 0           | 0            |
| <i>rpoB</i>  | 0           | 0           | 0           | --          | 0           | 0            |
| <i>trpB</i>  | 4.0E-04     | 3.5E-03     | 1.7E-03     | 5.8E-02     | --          | 3.3E-03      |
| concatenated | 1.6E-01     | 4.5E-01     | 3.8E-01     | 3.4E-01     | 4.7E-01     | --           |

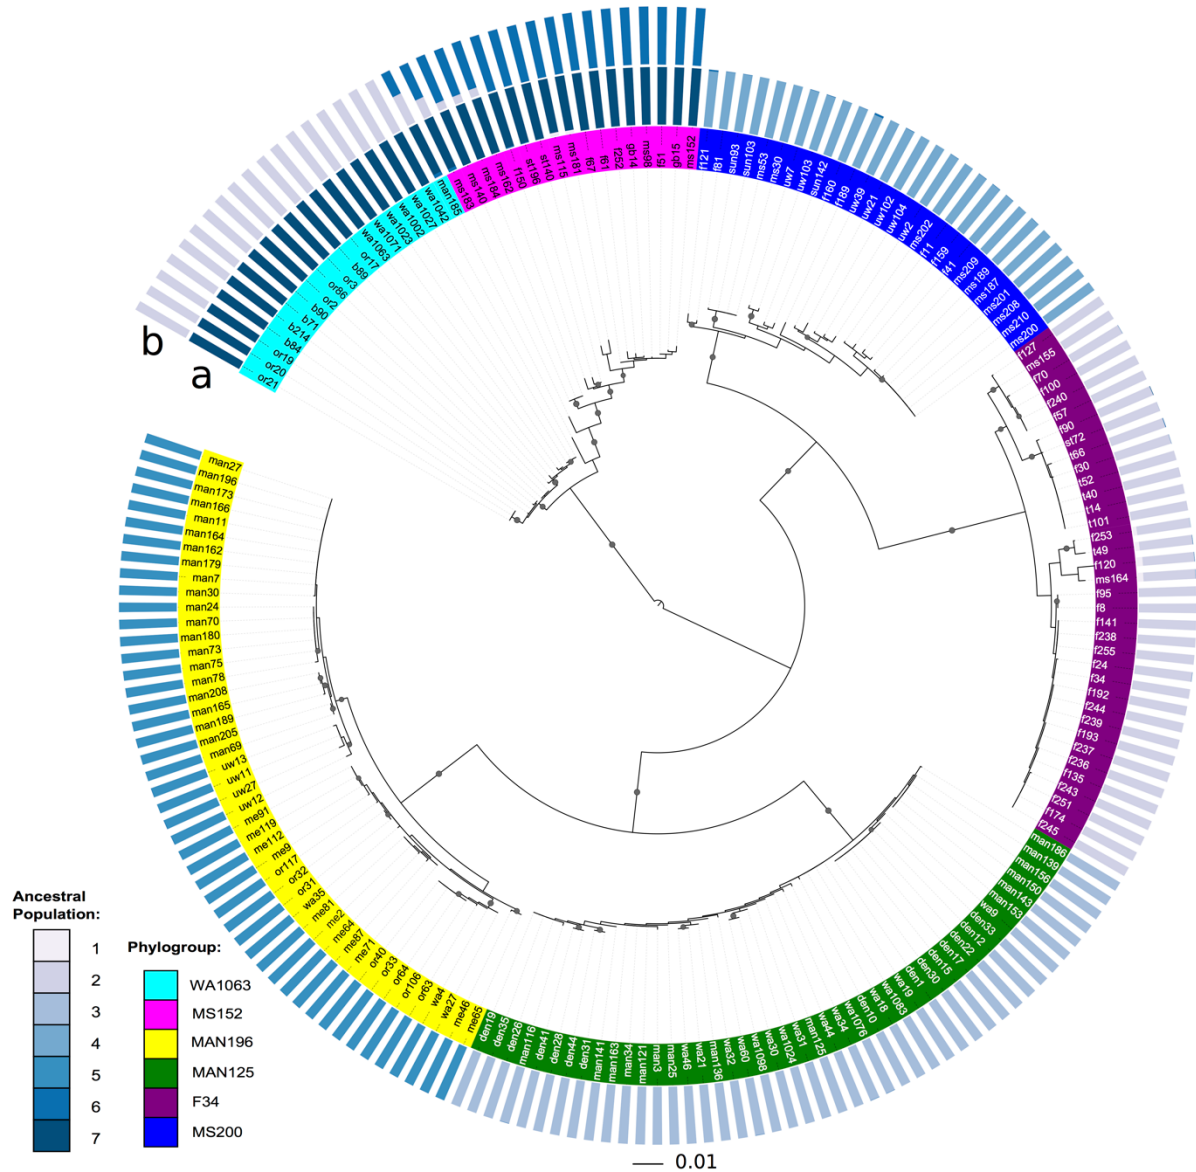

**Figure S1.** Structure analysis was performed on all sequences, irrespective of phylogroup membership, revealing that the genetic ancestry of each group is consistent with phylogroup boundaries as defined by ANI cutoffs. (This approach differs from that depicted in Figure 1 which shows the results of independent Structure analyses performed on each separate phylogroup.) The colored bars in outer rings indicate genetic contributions from different ancestral populations as indicated in the legend (a). Since WA1063 and MS200 share an ancestral population, we performed an additional Structure analysis that included only sequences from these phylogroups, and this analysis reveals clear subdivision between these phylogroups (b). Taxa names in the inner ring are colored to indicate the phylogroup designation of each strain as defined in the legend. The tree was constructed from concatenated MLSA loci nucleotide sequences using maximum likelihood with a GTRGAMMA evolution model. Scale bar represents nucleotide substitutions per site. The root was defined by *Mycobacterium smegmatis*. Nodes with bootstrap confidences > 80 are indicated with gray circles, and precise bootstrap values are found in Figure S3A.

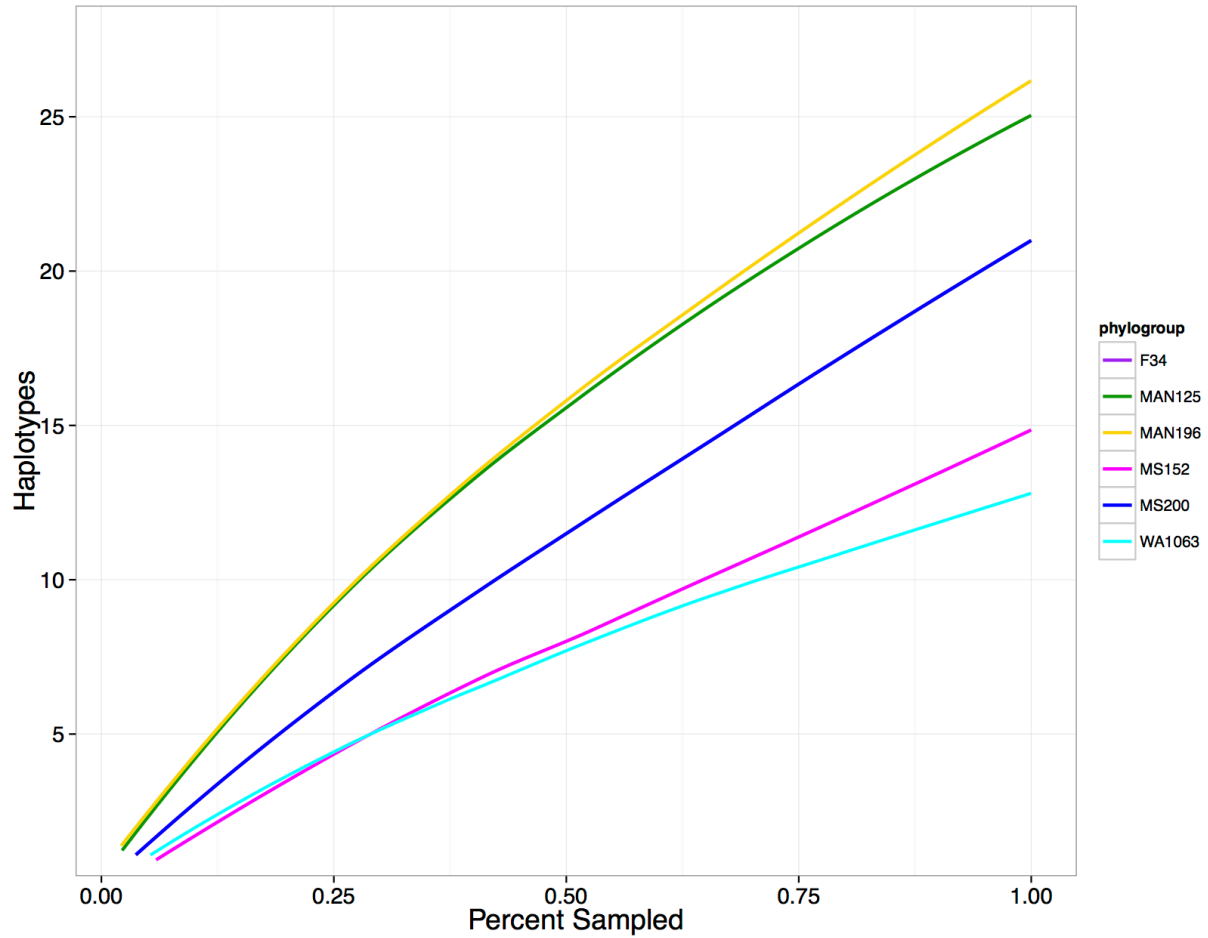

**Figure S2.** Rarefaction indicates that the recovery of unique MLSA haplotypes for each phylogroup is unsaturated, indicating there is substantial un-sampled haplotype diversity. To normalize sampling efforts between phylogroups, the number of unique MLSA haplotypes is plotted against the percent of total isolates sampled for MLSA (Table 2). The rarefaction curves for phylogroups MS200 and F34 are identical. Good's coverage estimations for each phylogroup can be found in Table S1.

A

# MLSA

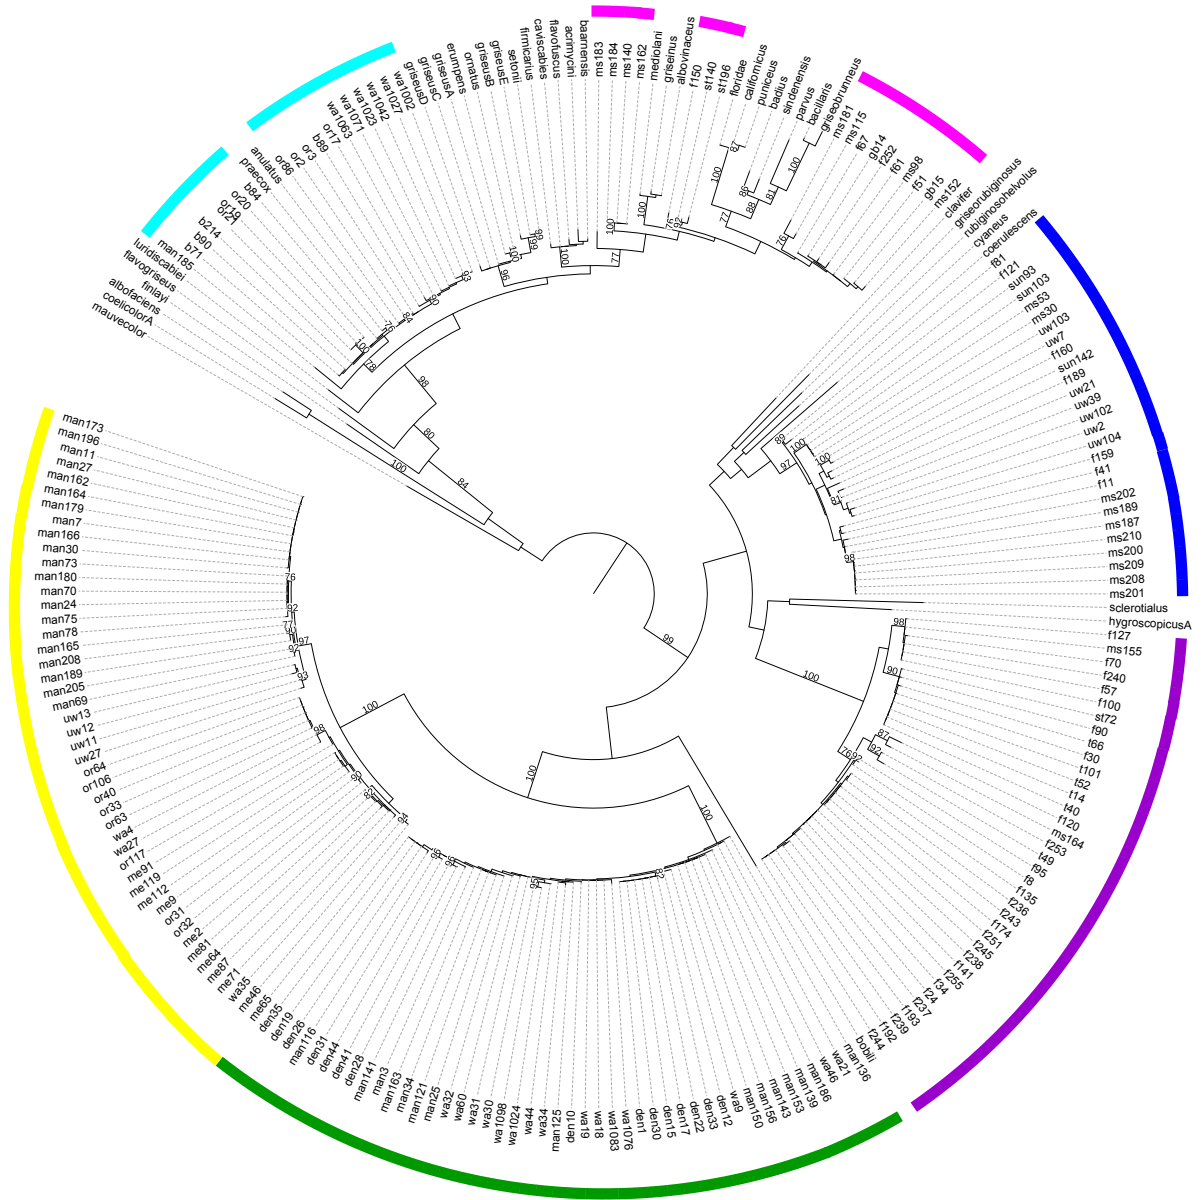

— 0.01



C

*gyrB*

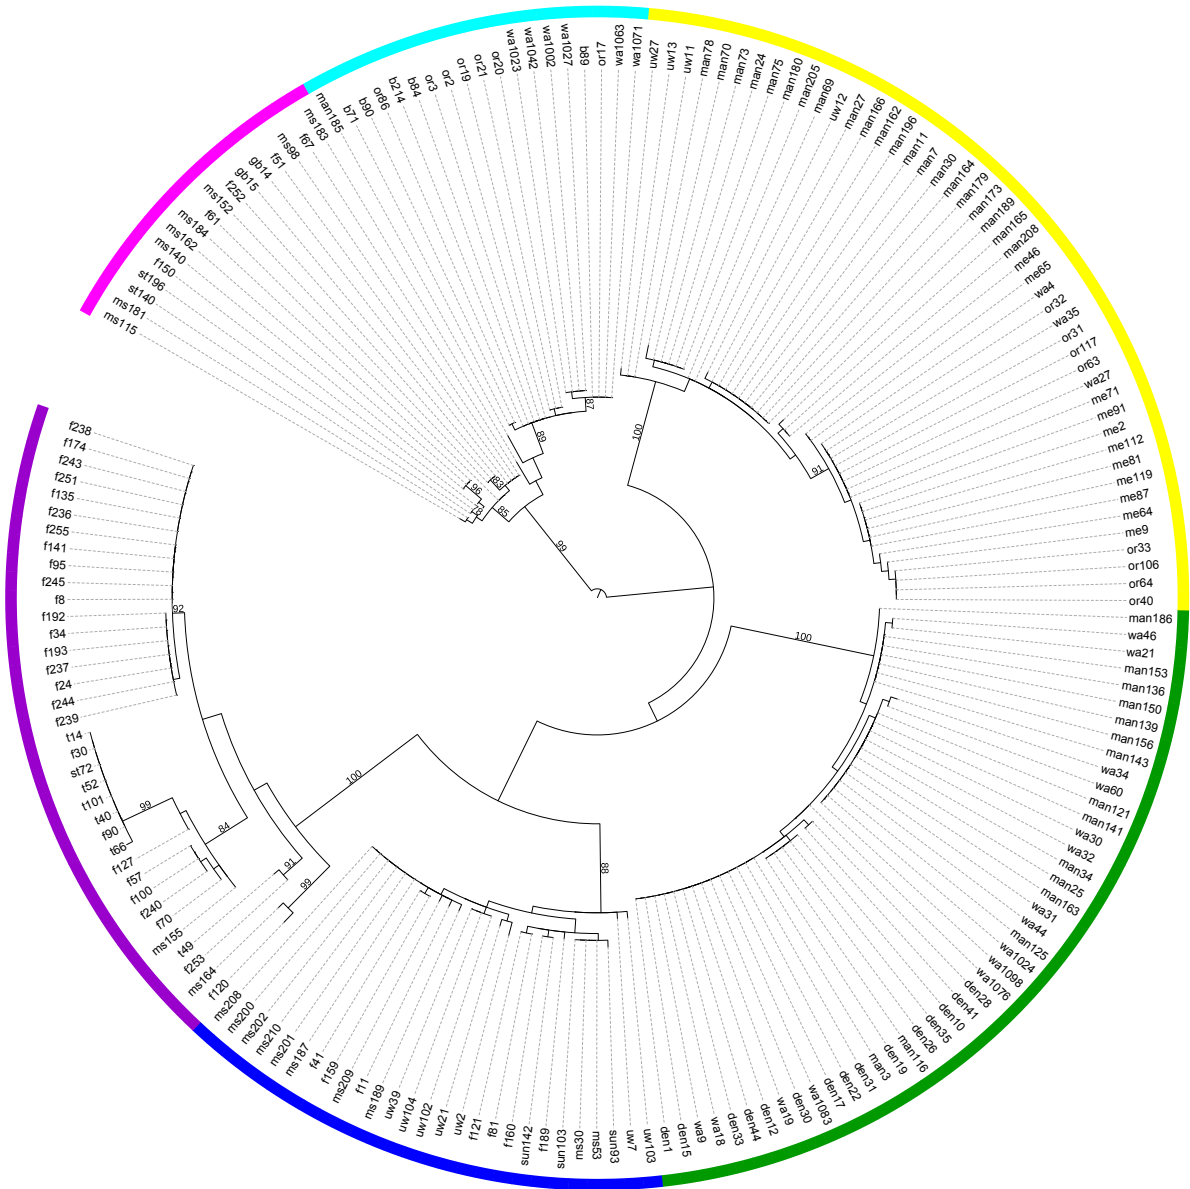

— 0.01

D

*recA*

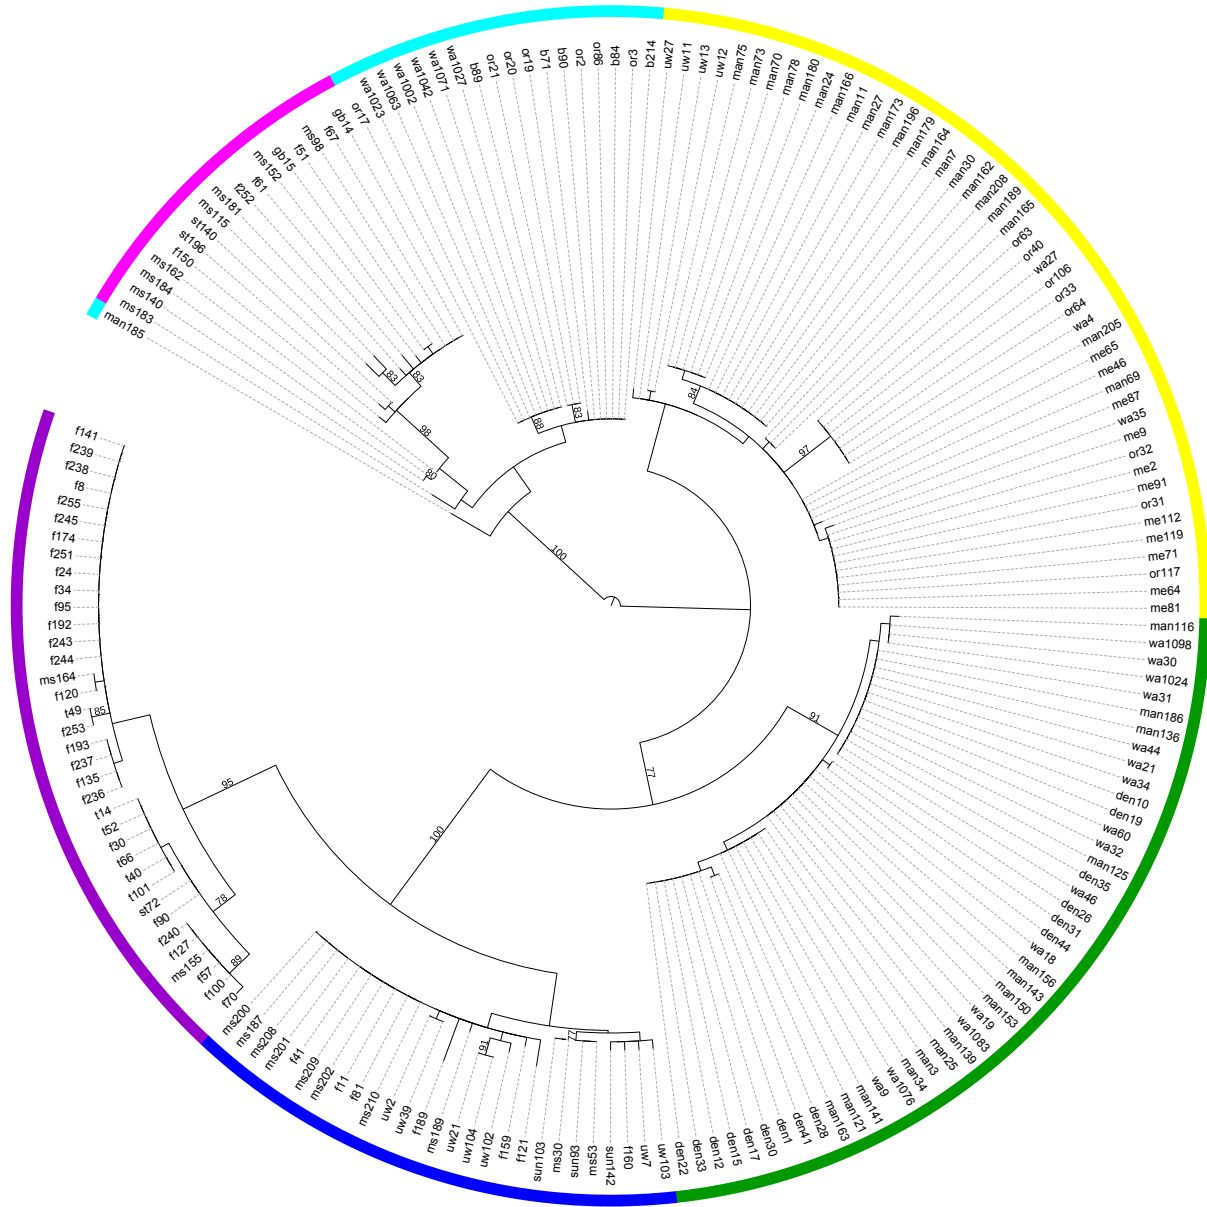

— 0.01

E

*rpoB*

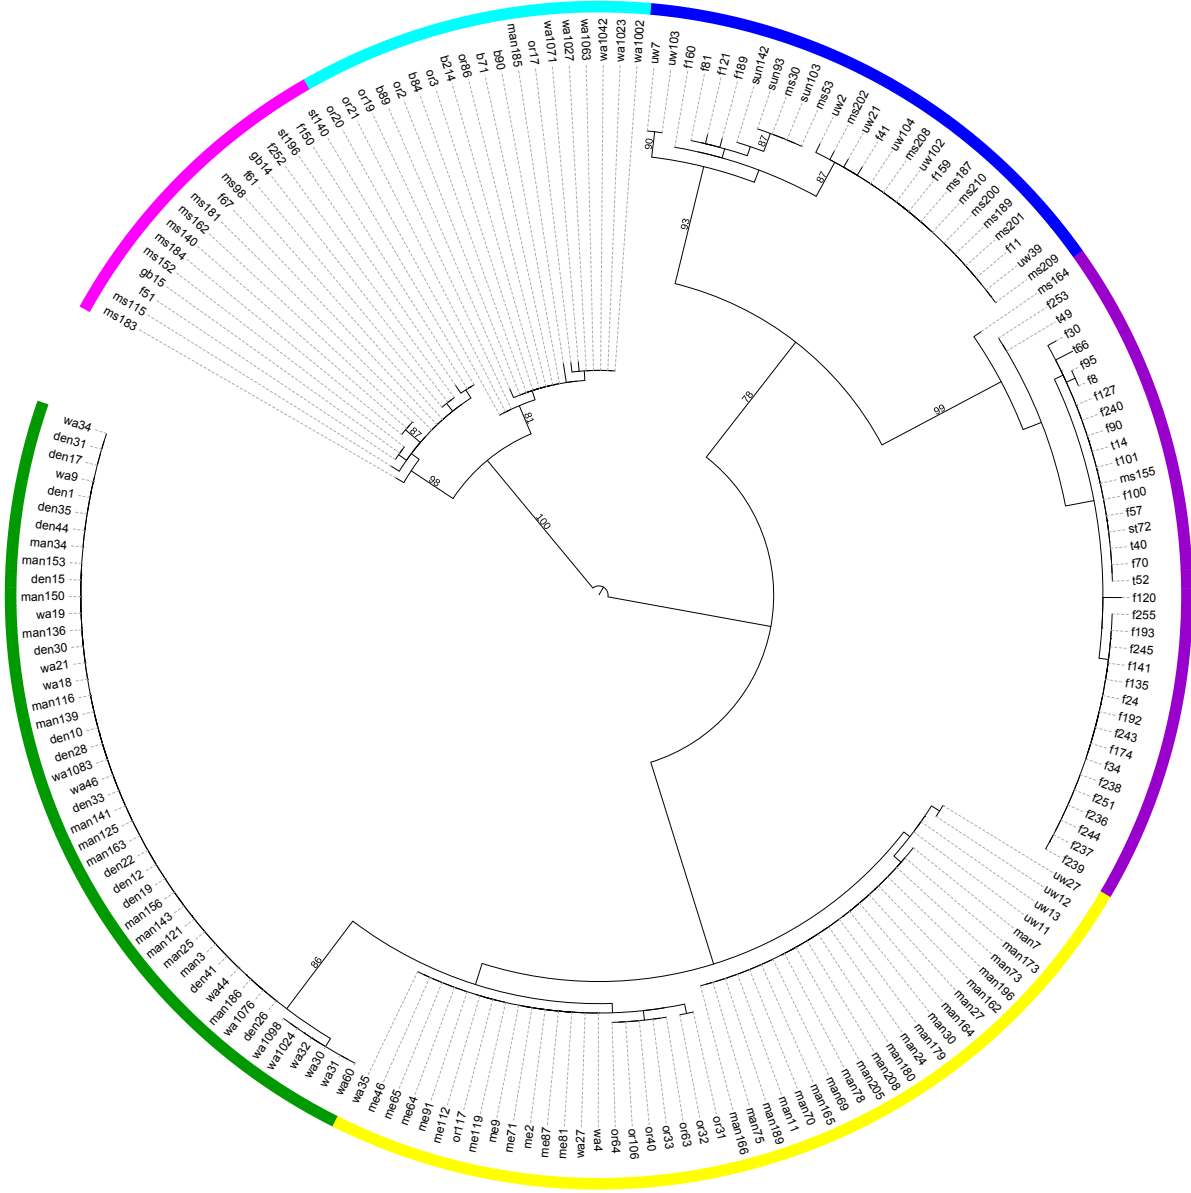

— 0.01



F

*trpB*

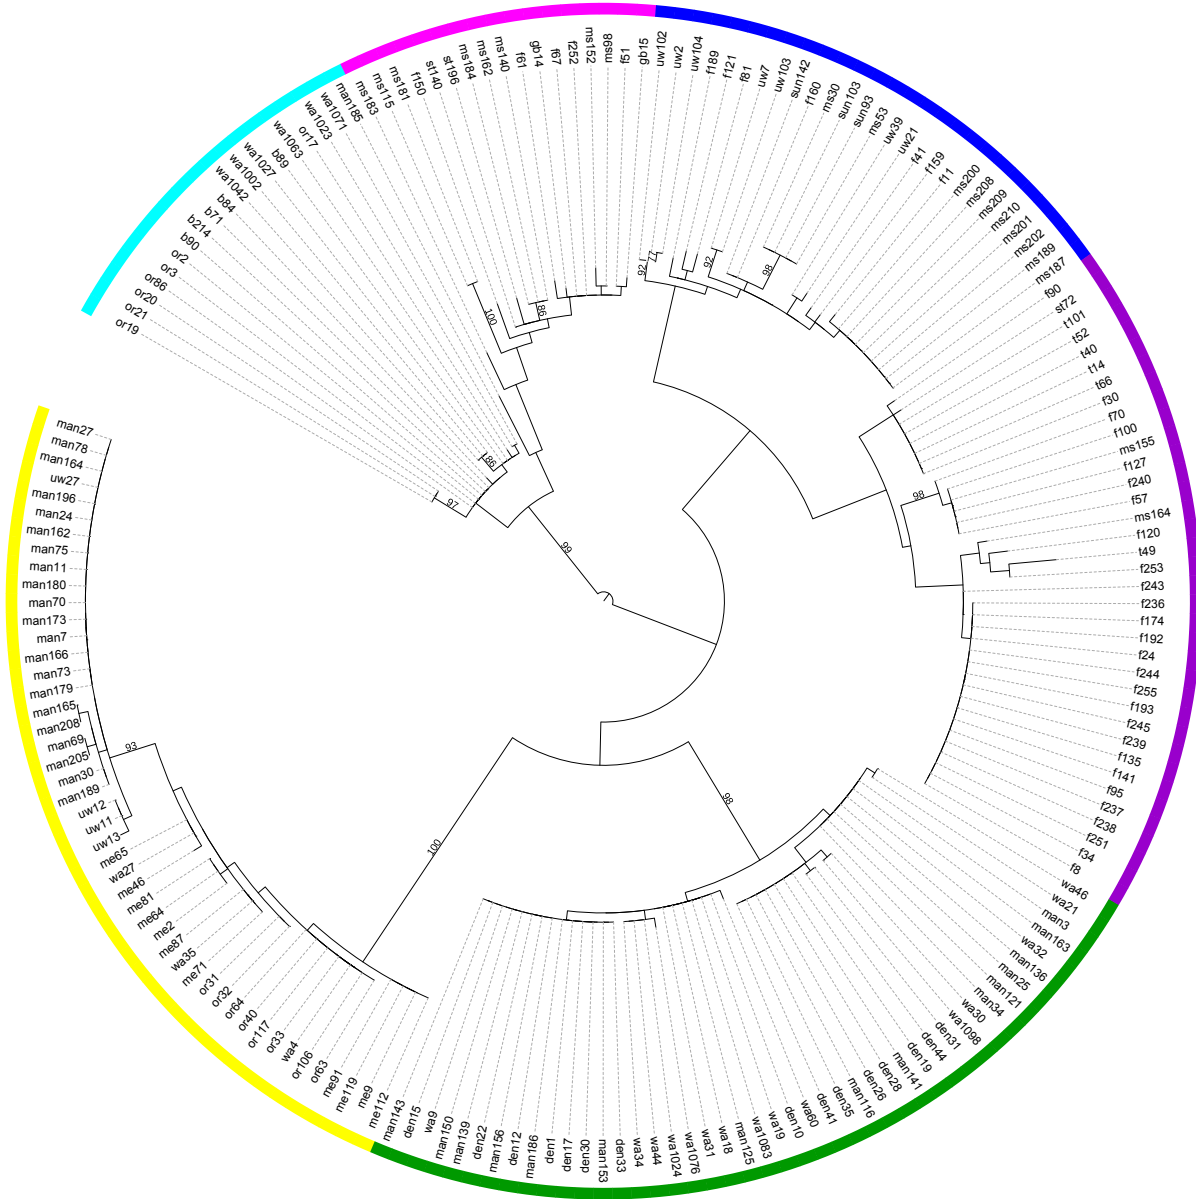

—0.01

**Figure S3.** Phylogenetic trees were constructed from nucleotide sequences of concatenated MLSA loci (A), *atpD* (B), *gryB* (C), *recA* (D), *rpoB* (E), *trpB* (F) by maximum likelihood with a GTRGAMMA evolution model. The scale bar represents nucleotide substitutions per site. Branches with bootstrap support values > 75 are labeled. For Figure S3A, representative isolates from PubMLST were included to orient phylogroup taxonomy to existing *Streptomyces* type strains. The root was defined by *Mycobacterium smegmatis* in each case. The outer color strip depicts phylogroup membership consistent with Figures 2 and 3 [green (MAN125), yellow (MAN196), teal (WA1063), blue (MS200), pink (MS152), purple (F34)]. The key for phylogroup isolate names can be found in Table 1.

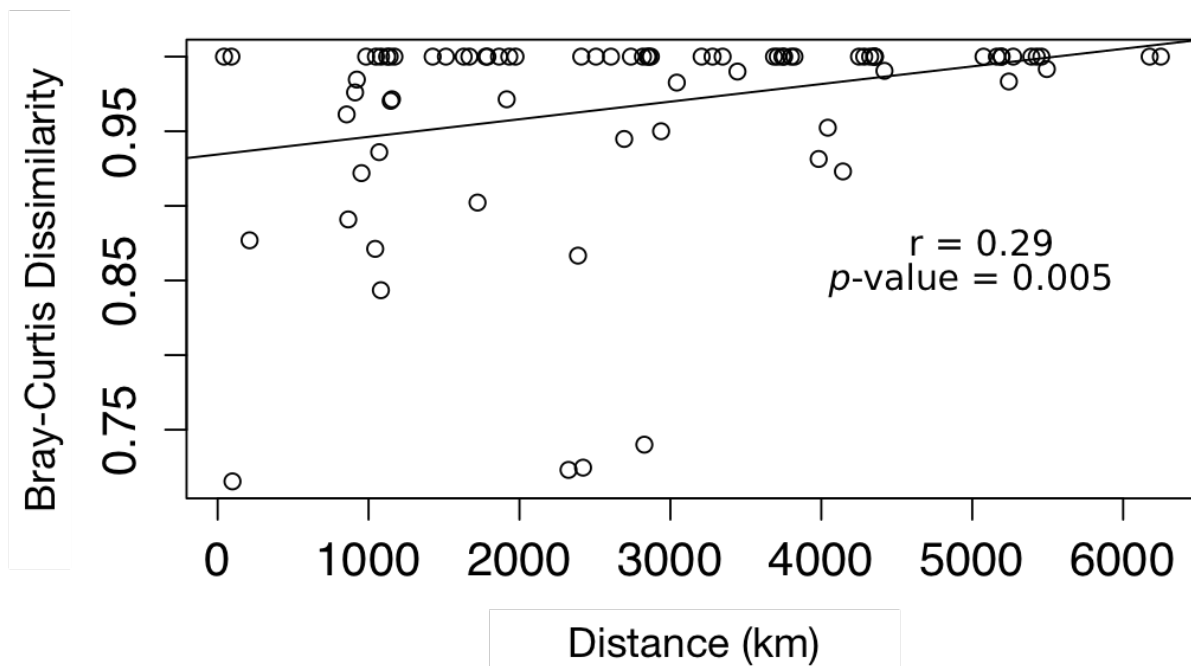

**Figure S4.** Gene flow limitation results in a significant relationship between geographic distance and allele composition between sites, determined using the Mantel test, such that sites closer together share more alleles. Bray-Curtis dissimilarity was calculated from unique allele composition across sites. The Mantel coefficient ( $r$ ) and  $p$ -value under the null hypothesis of no correlation between the matrixes are reported.
